# Supplementary material for: Modulation of NBAS-Related Functions in the Early Response to SARS-CoV-2 Infection
Source: MDPI journal article supplement (doi:10.3390/ijms24032634), 2023-01-30
Supplement: s1 [file s1]

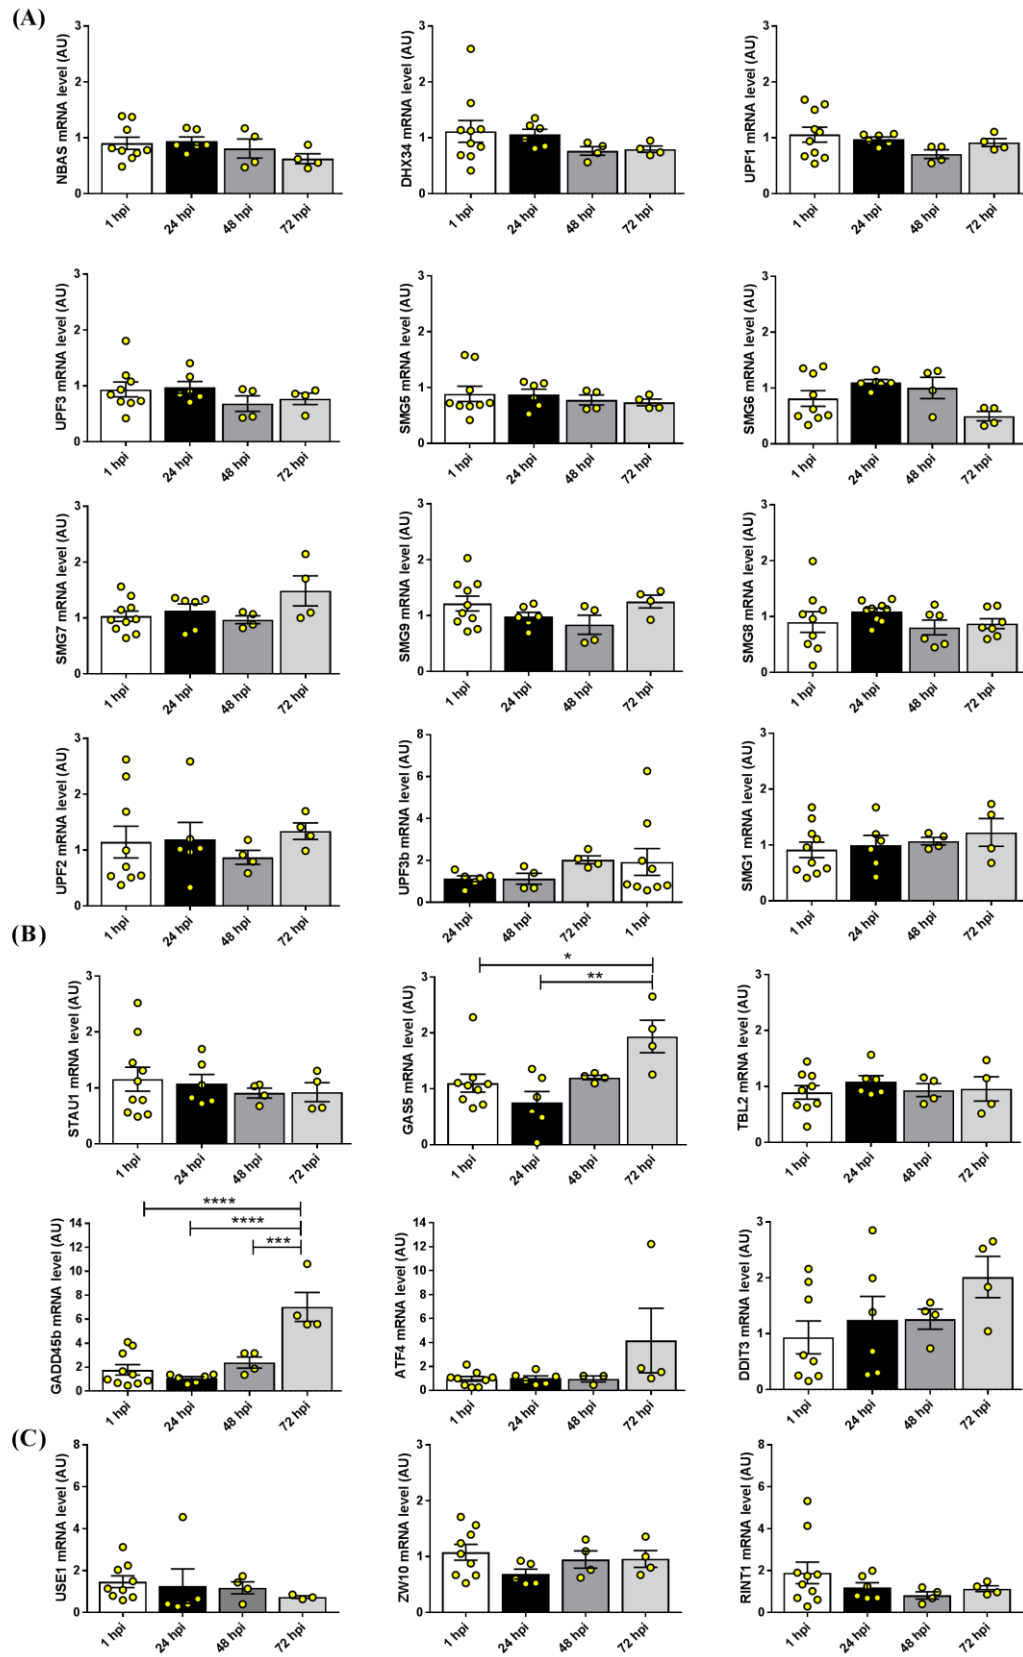

**Figure S1.** Gene expression analysis in SARS-CoV-2 infected vs not-infected Calu3 cells up to 72 hours-post-infection (hpi). (A) *NBAS* and core genes of the NMD pathway; (B) *STAU1* and known NMD targets; and (C) components of the syntaxin 18 complex known to interact with *NBAS*. Each bar represents the mean of at least four technical replicates  $\pm$  standard error of the mean (SEM); analysis of the outliers was performed using the ROUT method and  $Q=1\%$ . \*  $p < 0.05$ , \*\*  $p < 0.01$ , \*\*\*  $p < 0.001$ , \*\*\*\*  $p < 0.0001$ . One-way ANOVA with the Bonferroni multiple comparison test.
